# Supplementary material for: Families with infants and toddlers in the COVID-19 pandemic: parental stress and child development considering social class
Source: Bundesgesundheitsblatt Gesundheitsforschung Gesundheitsschutz. 2023 Jul 20;66(8):911–9. [Article in German] doi: 10.1007/s00103-023-03744-x (PMC10371926; doi:10.1007/s00103-023-03744-x)
Supplement: Supplementary file 1 [file 103_2023_3744_MOESM1_ESM.pdf]

## Onlinematerial

**Tabelle Z1:** Übersicht über die Items zur kindlichen Entwicklung im Elternfragebogen und ärztlichem Dokumentationsbogen in der Studie KiD 0-3 2022

| Befragte                | Eltern (Online Fragebogen)                                                                                                                                                                         | Ärztinnen und Ärzte (Dokumentationsbogen)                                                                                                                                                                                                                                                                                                                       |
|-------------------------|----------------------------------------------------------------------------------------------------------------------------------------------------------------------------------------------------|-----------------------------------------------------------------------------------------------------------------------------------------------------------------------------------------------------------------------------------------------------------------------------------------------------------------------------------------------------------------|
| Einführungstext         | Was denken Sie, hat sich die Corona-Pandemie Ihrem Eindruck nach auf die Entwicklung des Kindes, mit dem Sie heute in der Arztpraxis sind, in den folgenden Bereichen ausgewirkt und wenn ja, wie? | Viele Folgen der Corona-Pandemie sind noch nicht bekannt. Uns interessiert Ihr fachlicher Eindruck, auch im Vergleich zu Gleichaltrigen vor der Corona-Pandemie: Hat sich die Pandemie auf die Entwicklung des Kindes ausgewirkt? Bitte schätzen Sie anhand der folgenden Bereiche ein.<br><br>Folgende Bereiche der Entwicklung des Kindes wurden beeinflusst: |
| Körperliche Entwicklung | Körperliche Entwicklung (Ihr Kind hat z.B. mehr als normal zu- oder abgenommen; es hat sich mehr oder weniger bewegt als sonst)                                                                    | Die körperliche Entwicklung                                                                                                                                                                                                                                                                                                                                     |
| Antwortkategorien       | Nein / ja, positiv / Ja, negativ / Weiß nicht                                                                                                                                                      |                                                                                                                                                                                                                                                                                                                                                                 |
| Soziale Entwicklung     | Reaktion auf andere Menschen (Ihr Kind ist z.B. aufgeschlossener geworden oder es hat sich mehr zurückgezogen oder eine größere Angst vor Fremden entwickelt)                                      | Die soziale Entwicklung                                                                                                                                                                                                                                                                                                                                         |
| Antwortkategorien       | Nein / Ja, positiv / Ja, negativ / Weiß nicht                                                                                                                                                      |                                                                                                                                                                                                                                                                                                                                                                 |
| Affektive Entwicklung   | Stimmung (Ihr Kind war oder ist z.B. häufiger gereizt oder es war/ist insgesamt gelassener geworden)                                                                                               | Die Stimmung/der Affekt                                                                                                                                                                                                                                                                                                                                         |
| Antwortkategorien       | Nein / Ja, positiv / Ja, negativ / Weiß nicht                                                                                                                                                      |                                                                                                                                                                                                                                                                                                                                                                 |
